# Supplementary material
Source: PubMed Central journal article supplement (PMC4732734)
Supplement: NIHMS738448-supplement-Suppl_1.pdf [file NIHMS738448-supplement-Suppl_1.pdf]

Cell

Supplemental Information

**Coordinated and Compartmentalized Neuromodulation  
Shapes Sensory Processing in *Drosophila***

Raphael Cohn, Ianessa Morante, and Vanessa Ruta

## Supplemental Experimental Procedures

### Generation of sytGCaMP Transgenic Flies

The coding sequence for GCaMP6s (Chen et al., 2013) (Addgene Plasmid #40753) was appended to the *Drosophila* synaptotagmin 1 coding sequence (DGRC Stock #4839) with an intervening 3xGS linker by PCR and Gibson Assembly (Gibson, 2009). The resulting product (sytGCaMP) was ligated into pJFRC-10xUAS (Addgene Plasmid #36432) and pJFRC-LexAOP (Addgene Plasmid #26224) and used to generate transgenic flies by PhiC31-based integration into *attp40*, *attp5* and VK00005 by Bestgene Inc. Additional transgenics were generated in which GCaMP6s was tethered to synaptogyrin (DGRC Stock #17821) but preliminary expression studies in projection neurons (as in Figure S1) revealed inferior presynaptic localization with fluorescence along the shaft of axons lacking presynaptic sites (data not shown).

### Fly Strains

Flies were maintained on conventional cornmeal-agar-molasses medium at 23-25°C and 60-70% relative humidity, under a 12 hr light: 12 hr dark cycle.

Strains and sources:

*VT026001-Gal4*, *VT043657-Gal4*, *VT203149-Gal4* (Vienna Drosophila Resource Center (VDRC); <https://braingazer.org/brainbaseweb>); *R25D01-Gal4*, *R93B07-Gal4*, *R66C08-Gal4*, *R16A06-Gal4*, *R35B12-Gal4*, *R53C03-LexA*, *R25D01-LexA*, *R14C08-LexA*, *R58E02-Gal4*, *R58E02-LexA* (Jenett et al., 2012; <http://flweb.janelia.org/cgi-bin/flew.cgi>), *UAS-GCaMP6s*, *UAS-tdTomato*, *LexAOP-tdTomato*, *LexAOP-ReaChR* (Inagaki et al., 2014), *MZ19-Gal4* (Ito et al., 1998), *VGlut-Gal4*, *UAS-DopR2-RNAi* (TRiP.HMC02893, generated by the TRiP at Harvard Medical School (NIH/NIGMS R01-GM084947)) (Bloomington *Drosophila* Stock Center); *MB247-DsRed* (Riemensperger et al., 2005) (gift from Andre Fiala, University of Göttingen); *MB247-LexA* (Pitman et al., 2011) (gift from Scott Waddell, University of Oxford); *LexAOP-P2X<sub>2</sub>* (Yao et al., 2012) (gift from Ori T. Shafer, University of Michigan); *OK107-Gal4* (Connolly et al., 1996); *TH-Gal4* (Friggi-Grelin et al., 2003); *DDC-Gal4* (Li et al., 2000); *Tub>Gal80>* (Gordon and Scott, 2009) (gift from Kristin Scott, University of California, Berkeley); *fmn* dDAT mutant (Kume et al., 2005); *DopR1<sup>attP</sup>*, *DopR2<sup>attP</sup>* (Keleman et al., 2012), *DopR1<sup>attP</sup>-DopR2<sup>attP</sup>* Double Mutant (Gift from Daisuke Hattori); *UAS-C3PA-GFP*, *LexAOP-SPAGFP-T2A-SPAGFP* (Ruta et al., 2010).; *UAS-FLP*, *brp>STOP>GFP* (Chen et al., 2014) (gift from Larry Zipursky, University of California, Los Angeles).

Detailed fly genotypes used by figure (with neuronal expression description):

Figures 1B and S4A:

*LexAOP-SPA-T2A-SPA;MB247(KCs)-LexA, LexAOP-SPAGFP*

Figures 1C, 7A-7C and 7F:

*UAS-GCaMP6s;VT026001(γ4-MBON)-Gal4,UAS-GCaMP6s/R25D01(γ2-MBON)-Gal4*

*UAS-GCaMP6s/UAS-GCaMP6s;R93B07(γ3-MBON)-Gal4/R66C08(γ5-MBON)-Gal4*

Figure 1D:

*UAS-C3PA-GFP/UAS-C3PA-GFP;TH(DAN subset)-Gal4, DDC(DAN subset)-Gal4/UAS-C3PA-GFP*

Figures 1E, 4A-4D, 5A, 5E, S11, S3A-S3B, S3D-S3F, S4B-S4H and S5E:

*UAS-sytGCaMP;R16A06(γ KCs)-Gal4*

Figures 2 and S2 :

*UAS-sytGCaMP, MB247(KCs)-DsRed;TH(DAN subset)-Gal4, DDC(DAN subset)-Gal4*

Figure 3A:

*UAS-sytGCaMP, MB247(KCs)-DsRed/R58E02(γ4-5 DANs)-LexA;TH(DAN subset)-Gal4, DDC(DAN subset)-Gal4/LexAOP-P2X2*

Figure 3B:

*UAS-sytGCaMP, MB247(KCs)-DsRed/R25D01(γ2 MBON)-LexA;TH(DAN subset)-Gal4, DDC(DAN subset)-Gal4/LexAOP-P2X2*

Figure 3C:

*UAS-sytGCaMP, MB247(KCs)-DsRed/R93B07(γ3 MBON)-LexA;TH(DAN subset)-Gal4, DDC(DAN subset)-Gal4/LexAOP-P2X2*

Figure 3D:

*UAS-sytGCaMP, MB247(KCs)-DsRed/R53C03(γ4 MBON)-LexA;TH(DAN subset)-Gal4, DDC(DAN subset)-Gal4/LexAOP-P2X2*

Figure 3E:

*UAS-sytGCaMP, MB247(KCs)-DsRed/R14C08-LexA(γ5 MBON);TH(DAN subset)-Gal4, DDC(DAN subset)-Gal4/LexAOP-P2X2*

Figure 4E:

*UAS-sytGCaMP/R58E02(γ4-5 DANs)-LexA;R16A06(γ KCs)-Gal4/LexAOP-tdTomato*

Figures 4F and S3C:

*hsFLP;UAS-sytGCaMP/UAS-tdTomato;R16A06(γ KCs)-Gal4/Tub>Gal80>*

Figures 5B and S5A:

*UAS-sytGCaMP/R58E02(γ4-5 DANs)-LexA;R16A06(γ KCs)-Gal4/LexAOP-P2X2*

Figure 5C:

*UAS-sytGCaMP;R16A06(γ KCs)-Gal4/(LexAOP-P2X2)*

Figures 5D:

*UAS-sytGCaMP;DopR2<sup>attP</sup>/DopR2<sup>attP</sup>;OK107(KCs)-Gal4*

*UAS-sytGCaMP;;OK107(KCs)-Gal4*

Figure 5E:

*UAS-sytGCaMP/UAS-DopR2-RNAi;16A06(γ KCs)-Gal4*

Figures 6A-6B, 7D, 7G-J and S7B-I:

*UAS-GCaMP6s/R58E02(γ4-5 DANs)-LexA;VT026001(γ4-MBON)-Gal4,UAS-GCaMP6s/LexAOP-P2X2*

Figure 6C:

*R25D01(γ2 MBON)-LexA/UAS-P2X2;VT203149(γ2 DAN)-Gal4/LexAOP-GCaMP6s*

Figures 6D, 7E, and S7J:

*R58E02(γ4-5 DANs)-LexA/UAS-GCaMP6s;25D01(γ2 MBON)-Gal4/LexAOP-P2X2*

Figure 6E:

*R53C03(γ4 MBON)-LexA/UAS-P2X2;VT203149(γ2 DAN)-Gal4/LexAOP-GCaMP6s*

Figure S1C:

*MZ19(PN subset)-Gal4/UAS-tdTomato;UAS-FLP,brp>STOP>GFP*

Figures S1D-S1E:

*MZ19(PN subset)-Gal4/UAS-sytGCaMP;UAS-tdTomato*

Figure S1F:

*UAS-sytGCaMP;;OK107(KCs)-Gal4*

*UAS-GCaMP6s;;OK107(KCs)-Gal4*

Figure S1G:

*VGlut(motorneurons)-Gal4;UAS-sytGCaMP;*

Figure S1H:

*MB247(KCs)-DsRed/UAS-sytGCaMP;R16A06(γ KCs)-Gal4*

Figure S1J:

*UAS-tdTomato, UAS-sytGFP;VT043657-Gal4*

Figure S3F:

*R58E02(γ4-5 DANs)-LexA, LexAOP-tdTomato;VT026001(γ4-MBON)-Gal4,UAS-GFP  
GCaMP6s/R25D01(γ2-MBON)-Gal4*

Figure S3G:

*UAS-sytGCaMP;R35B12(α'β' KCs)-Gal4*

Figure S4C:

*UAS-GCaMP6s;R16A06(γ KCs)-Gal4*

Figure S5B:

*nSyb(neuronal)-Gal4*

*nSyb(neuronal)-Gal4/UAS-DopR2-RNAi*

Figure S5C:

*UAS-sytGCaMP;DopR1<sup>attP</sup>/DopR1<sup>attP</sup>;OK107(KCs)-Gal4*

Figure S5D:

*UAS-sytGCaMP;DopR1<sup>attP</sup>, DopR2<sup>attP</sup>/DopR1<sup>attP</sup>,DopR2<sup>attP</sup>;OK107(KCs)-Gal4*

Figure S5E:

*dDAT mutant/dDAT mutant;R16A06(γ KCs)-Gal4/UAS-sytGCaMP*

Figure S6A:

*UAS-GCaMP6s/R58E02(γ4-5 DANs)-LexA;VT026001(γ4-MBON)-Gal4/LexAOP-ReaChR*

Figure S6B:

*UAS-GFP/R58E02(γ4-5 DANs)-LexA;R16A06(γ KCs)-Gal4/LexAOP-P2X2*

Figure S6C:

*UAS-GCaMP6s;VT026001(γ4-MBON)-Gal4,UAS-GCaMP6s/(LexAOP-P2X2)*

*R25D01(γ2 MBON)-LexA/(UAS-P2X2);LexAOP-GCaMP6s*

### **Sparse Labeling**

Sparse labeling of  $\gamma$  KCs for functional imaging (Figures 4F and S3C) was achieved by stochastic excision of ubiquitous Gal80 repression through expression of FLP-recombinase under the heat-shock promoter as described (Wu and Luo, 2006). Briefly, flies with the genotype: *hsFLP;UAS-sytGCaMP/UAS-tdTomato;R16A06(γ KCs)-Gal4/Tub>Gal80>*, were incubated at 21°C to reduce spontaneous FLP-recombinase activation and transferred into new vials every 1-2 days. During the late pupal stage the vials were heatshocked by immersion in a 37°C water bath for 10-30 minutes and then returned to incubation at 21°C until dissection.

### **Imaging**

All functional imaging experiments were performed on an Ultima two-photon laser scanning microscope (Bruker Nanosystems) equipped with galvanometers driving a Chameleon Ultra II Ti:Sapphire laser. Emitted fluorescence was detected with either photomultiplier-tube or GaAsP photodiode (Hamamatsu) detectors. Images were acquired with an Olympus 60 $\times$ , 0.9 numerical aperture objective at 512 pixels  $\times$  512 pixels resolution. For fast-scanning volumetric imaging *in vivo*, the laser was directed through an 8kHz resonant scanning galvanometer and the objective was controlled by a piezo-electric Z-focus. Z-planes were defined in order to encompass the entire volume of the  $\gamma$  lobe. 12-18 planes were recorded, spaced  $\sim$ 2  $\mu$ m apart and the entire volume was imaged at a rate of  $\sim$ 1.5Hz.

### **Photolabeling of neurons**

To photolabel DANs innervating specific  $\gamma$  lobe compartments (Figure 1C) we expressed C3PA-GFP in most DANs driven by the combination of TH-Gal4 and DDC-Gal4. To label individual  $\gamma$  KCs (Figures 1B and S4A) we expressed SPA-GFP in all KCs driven by MB247-LexA. We targeted specific  $\gamma$  lobe compartments (for DAN labeling) or individual KC soma (for single KC labeling) using 925 nm laser illumination, a wavelength that does not cause significant photoconversion. To photolabel neurons, we defined an ROI in PrairieView Software in a single Z-plane and exposed the target area to 710 nm light ( $\sim$ 10-30 mW at the back aperture of the objective) 10-15 times. After diffusion of the photoconverted fluorophores throughout the targeted neurons for 10-30 minutes, we imaged at 925 nm using 1  $\mu$ m steps.

### **Functional Imaging**

For *ex vivo* experiments brains were dissected in external saline (108 mM NaCl, 5 mM KCl, 2 mM CaCl<sub>2</sub>, 8.2 mM MgCl<sub>2</sub>, 4 mM NaHCO<sub>3</sub>, 1 mM NaH<sub>2</sub>PO<sub>4</sub>, 5 mM trehalose, 10 mM sucrose, 5 mM HEPES pH7.5, osmolarity adjusted to 275 mOsm), briefly treated with collagenase in external saline (2 mg mL<sup>-1</sup>, 30 sec), washed, and then pinned with fine tungsten wires to a thin Sylgard sheet (World Precision Instruments) in a 35 mm petri dish (Falcon) filled with saline. For *in vivo* imaging, flies were prepared as previously described (Murthy and Turner, 2013a; Ruta et al., 2010). Briefly, 2-5 day old flies were temporarily anaesthetized using CO<sub>2</sub> (for <30 s) and then tethered to a piece of tape covering a hole in the bottom of a modified 35 mm petri dish using a human hair placed across the cervical connectives. A small hole was cut into the tape, precisely above the head, to allow the top of the head capsule to extend above the plane of the tape. A dot of UV-curable glue (Loctite) was applied to the eyes to restrict head movement. The dish was then filled with external saline and the head capsule was opened by carefully cutting and folding back the flap of cuticle covering the dorsal portion of the head. Muscle 16 and obstructing trachea were removed with sharpened forceps. In ATP and acetylcholine injection experiments, the open head capsule was briefly bathed in collagenase (2 mg mL<sup>-1</sup>, 30 sec) to weaken the perineural sheath. Care was taken to keep the antennae and antennal nerves intact. On rare occasions, flies showed no movement or odor responses and were discarded.

### ***Volumetric imaging of single KC in a brain explant***

To visualize  $\text{Ca}^{2+}$  influx throughout the axonal arbor of a single KC (Figures 1E and S1I) with high spatial resolution, the same voltage was used to repeatedly iontophoretically stimulate the calyx with acetylcholine as described below, allowing for equivalent activation of the neuron at each of 45 planes spaced  $\sim 1 \mu\text{m}$  apart. The representative image shown is the maximum Z-projection of the peak intensity response to stimulation for each imaging plane. In comparison to volumetric imaging by resonant scanning used *in vivo* (below), this strategy yielded better image quality due to greater temporal averaging at this slower scanning rate.

### **Odor stimulation**

Odor stimulation was achieved by directing a continuous stream (400-500 mL/min) of clean air through a 2 mm diameter teflon tube directed at the fly's antenna (carrier stream). 5-10% of the total airstream was diverted through the headspace of a 10 mL glass vial containing paraffin oil (odor stream). At a trigger, a custom-built solenoid valve controller system redirected the odor stream from a blank vial to a vial containing various odorants diluted in paraffin oil (Sigma) to a final volume of 1 mL. Final odorant dilutions were between 1:20-1:200, depending on the identity of the odorant. In experiments where odor concentration was varied (Figures S3E and S4H), the fraction of odor stream directed to the fly was adjusted to give final concentrations between 1:100 and 1:1000. Odorants used were isobutyl acetate (CAS #110-19-0), trans-3-hexen-1-ol (CAS #928-97-2), benzaldehyde (CAS #100-52-7), 3-octanol (CAS #589-98-0), methancyclohexanol (CAS #589-91-3) and Apple Cider Vinegar (Heinz). In a subset of experiments, a fraction of the olfactometer output air stream was redirected to a mini-PID (Aurora Scientific) in order to measure odorant waveforms and ensure the consistency of odor presentations across trials. Given that we observed no difference in the patterns of pre-synaptic  $\text{Ca}^{2+}$  along KC axons or MBON responses to different odorants, we averaged responses across odors to generate the normalized odor-evoked sytGCaMP profile in Figures 4 and 5 and to generate MBON response profiles in Figure 7B and 7D-7F.

### **Activation of P2X<sub>2</sub>-expressing Neurons by ATP Injection**

To activate DANs or MBONs expressing P2X<sub>2</sub> (Figures 3, 5B-C, 6, 7D-E, 7G-J, S5A, S6B-C and S7) a glass stimulating electrode, pulled to a resistance of 7-10 M $\Omega$ , was filled with 2 mM ATP in external saline. Stimulating electrodes were positioned dorsal to the mushroom body's medial lobes, in the superior medial protocerebrum, at the site of rich  $\gamma 4$  and  $\gamma 5$  DAN dendritic and MBON axonal innervation. In some experiments tdTomato was co-expressed in 58E02+ DANs to serve as an anatomic guide. The stimulating electrode was coated with BSA-conjugated Texas Red Dye (Life Technologies) in order to visualize electrode position (Ishikawa et al., 2010). In experiments examining *in vivo* modulation of KC presynaptic  $\text{Ca}^{2+}$  (Figures 5B-C and S5A), ATP was injected in short bursts ( $\sim 15$  pulses) over the span of 2-3 minutes, with  $>1$  minute between the pre-injection odor stimulus and the start of injection and  $>1$  minute recovery period following injection before post-injection odor stimulus. For all other experiments involving ATP injection a single brief pulse of positive pressure was applied manually or using a custom-built pressure injector. Protocol for ATP stimulation in other experiments described below.

### **Calycal and Glomerular Stimulation**

Glass stimulating electrodes were pulled to a resistance of 7-10 M $\Omega$  and then filled with 10 mM acetylcholine (Sigma) in external saline. Stimulating electrodes were positioned into the mushroom body calyx (Figures 1E, 4D, 6, 7C, 7H-I, S1F, S1I, S4D-G, S6C and S7C-J) or the center of the DA1 glomerulus (Figure S1D) viewed under IR-DIC optics. Square voltage pulses (500 ms long, 0.1-10V for all imaging experiments, 0.1-2ms long, 10-100V for electrophysiology in Figure 6A) generated by a stimulator (Grass Technologies) were used to excite Kenyon cell or antennal lobe projection neuron dendrites. To account for variation in electrode tip and positioning, the iontophoretic voltage was titrated to evoke robust but non-saturating responses in the neurons being recorded. For Figures 1E, S1F and S1I, the iontophoretic voltage was titrated until 1-2 KCs were stimulated, as evident by a sole active process running through the pedunculus where KC axons are unbranched, fasciculated, and parallel. For Figures S4D-S4G, stimulation was performed twice at each voltage indicated between 1-10V.

### **Paired and Unpaired Stimulation Protocols**

For ‘paired’ stimulation of DANs and KCs, KC stimulation and DAN activation via ATP injection were temporally paired as illustrated in Figure 7G. In experiments where KCs were directly activated (Figures 7H-I and S7C-J) KC stimulation was performed as described above for a duration of 500 ms, immediately followed by a 200 ms ATP injection via pressure injector as described above. For odor stimulation *in vivo* (Figure 7J), two odors (isobutyl acetate and hexanol) were each presented as described above at least 2 times with >45 seconds between exposure to establish stable baseline responses. One of the odors was then paired with a 200 ms pressure pulse of ATP beginning 500 ms after the start of the odor pulse. Each odor was used as the ‘paired’ odor in alternate experiments in order to control for any odor-specific effects. All DAN activation experiments were ‘unpaired’ unless noted. In ‘unpaired’ experiments, KC stimulation or odor presentation were performed >45 seconds before and after ATP injection in order to temporally separate DAN and KC activation.

### **Tethered Fly Behavior**

#### ***Recording Fly Motor Activity***

To simultaneously record the fly’s motor activity during imaging (Figures 2B, 2D-2E, and S2) a Point Grey Firefly Camera with Infinity Lens (94 mm focal length) was focused on the fly, which was illuminated by infrared LED lights. Video was captured at 30 frames per second. Fly motion traces were extracted using a custom Matlab script that measures average absolute difference in pixel intensities between each frame and the preceding frame. Manual inspection of this automated analysis confirmed that it accurately registers the difference between the two behavioral states (flailing and quiescence) we observed in the tethered fly. Laser-scanning onsets and offsets, visible in the video recordings due to laser illumination through the head-capsule were used to align videos with imaging data. In light of the demonstrated correlation between DAN activity state and fly locomotion, we note that all other imaging experiments were performed without regard for the fly’s behavioral state, which was presumably a comparable alternating pattern of flailing and pausing.

#### ***Sugar feeding*** (Figures 2B, 5A, 7F and S2A)

1-3 day old flies were fasted for 20-26 hours by transferring to an empty vial containing only a damp Kim-wipe. Flies were tethered for imaging as described above and positioned on the microscope. After recording baseline neural responses, a small wick of Kim-wipe fibers soaked in 0.2-1 M sucrose solution was positioned near the fly’s proboscis using a motorized micromanipulator (Scientifica). The wick was touched to the proboscis to initiate feeding. Blue food coloring was added to the sucrose solution and fly abdomens were inspected after each experiment to confirm sucrose ingestion. Data for flies that had not consumed the sucrose solution were discarded. We observed no apparent difference in evoked changes in KC activity (Figure 5A) depending on sucrose concentration so data from different stimulations were pooled. For DAN and MBON imaging (Figures 2B and 7F) 0.2 M sucrose solution was uniformly used.

#### ***Electric Shock*** (Figure 2C)

The *in vivo* dissection dish described above was modified so that two steel threaded studs (McMaster-Carr) could be precisely positioned to make contact with either side of the fly’s abdomen during tethering. The ends of the steel electrode leads were connected to a stimulator (Grass Technologies), which was used to apply a 500 ms pulse of 60-150V, comparable to the electrical shock parameters used in classical olfactory conditioning paradigms (Tempel et al., 1983; Tully and Quinn, 1985). Current flow through the circuit was monitored by an oscilloscope and the stimulating voltage was adjusted to maintain approximately equivalent current flow across trials to compensate for buildup of resistance following shocking.

#### ***Simulated walking*** (Figure S2B)

A small foam ball (~1 mm diameter, Matsubara Sangyo Co.) (Kohatsu et al., 2011) was positioned within the fly’s grasp to allow the fly to ‘walk’ on the ball during imaging. Placement was adjusted to ensure free range of motion over 360°.

### **Image processing and Data Analysis**

All image processing was done using FIJI/ImageJ (NIH). Further analysis was performed using custom scripts in ImageJ, Microsoft Excel, Matlab and R. When necessary, to correct for motion during *in vivo* imaging, recordings were stabilized using the StackReg ImageJ plugin. When neurons were co-labeled with

tdTomato, the MultiStackReg ImageJ plugin was used to stabilize the red channel and the transformations generated were applied to the green functional imaging channel. Images were smoothed with a Gaussian filter (s of 1-2 pixels). Areas outside of the  $\gamma$  lobes were partially masked in representative images for clarity as indicated.

**Intensity profile plots** (Figures 4C-D, 5, S3B-C, S3E-F, S4E, S4G and S5C-E)

The frame containing the peak fluorescence (see below) from an odor stimulus was manually rotated so that the longitudinal axis of the  $\gamma$  lobe lay along the x-axis, with the lateral-most edge at  $x=0$ . Regions outside of the  $\gamma$  lobe, easily distinguishable from the dense KC labeling within the lobe, were manually masked in each image. To generate the intensity profile across the lobe, we averaged the intensity of all pixels along the y-axis, for each point x along the horizontal axis of the lobe. To account for variations in imaging orientation, the resulting profiles were normalized to the same length (1000 'pixels') by linear interpolation. The average raw profile length was 315 pixels with a standard deviation of 19 pixels. The resulting 1000 'pixel' profile plots were smoothed by calculating a moving average of 30 'pixels' (3% of the total profile length). Each intensity profile was normalized to its mean intensity value in order to allow for comparison across animals and conditions. Similar results were obtained from normalizing to the maximum intensity value or median intensity value. For every data point, the plots of 2 odor-evoked profiles were averaged to correct for any motion artifacts. Because we observed no difference in the  $\text{Ca}^{2+}$  profiles evoked by different odorants (Figure S3E), we averaged data across odor stimuli. Initial experiments were carried out using the maximum intensity projection from volumetric imaging experiments. However, as we observed little variation in the intensity profile across imaging planes (Figure S3A-B), we combined data from experiments collected in traditional galvo scanning mode at single planes with maximum intensity Z-projections from resonant scanning volumetric data. When single planes were imaged, we chose planes that revealed the largest longitudinal portion of the lobe and contained  $\gamma 2$ - $\gamma 5$  compartments.

Quantification of neural activity using functional  $\text{Ca}^{2+}$  imaging is typically performed by normalizing the change in intensity by the pre-stimulus intensity ( $\Delta F/F_0$ ). This normalization helps control for variations in reporter expression and imaging parameters so that comparisons can be made between different neurons or different experiments. In quantifying the modulation of KC synapses, however, we found this measure to be inappropriate. The asymmetric distribution of  $\text{Ca}^{2+}$  along KC axons is often apparent in the basal state (Figure S3D), prior to odor stimulation. Differences in synaptic  $\text{Ca}^{2+}$  along KCs are not present in the brain explant (Figures 4D and S4D-E) indicating that they reflect *in vivo* modulation rather than differences in sytGCaMP expression (Figure S4D). Therefore, normalizing odor-evoked responses by the basal fluorescence values would serve to mitigate the modulation we were seeking to quantify. Thus to quantify  $\text{Ca}^{2+}$  distribution along the  $\gamma$  lobe we used the peak intensity values.

To calculate the change in intensity profiles due to artificial (Figures 5B-5C) or physiological DAN activation from sugar feeding (Figure 5A), we subtracted the average normalized intensity profile measured prior to DAN activation from the average normalized intensity profile after activation in each fly. The resulting difference plot was averaged across flies.

**Compartmental border determination:**

To generate an average intensity value for each compartment of the  $\gamma$  lobe (Figures 4C, 5, S4E and S4G), we needed to accurately define compartmental borders. In order to define consistent compartmental borders, we used the strategy outlined in Figure S3F. Specifically, flies with fluorescently labeled DANs and/or MBONs ( $n=10$  including TH-Gal4, DDC-Gal4>UAS-GCaMP6s; 58E02-LexA>LexAOP-tdTomato; 25D01-Gal4, VT026001-Gal4>UAS-GCaMP6s) were aligned and profiled as described above to generate the intensity profile plots for KCs. Regions of extrinsic neuron innervation in each compartment were used to generate average border positions, that divided the 1000 'pixels' along the x-axis. We defined the average  $\gamma 2$ -3 border at pixel  $x=297$ ,  $\gamma 3$ -4 border at pixel  $x=560$  and  $\gamma 4$ -5 border at pixel  $x=821$ . The border positions were relatively consistent across animals but showed minor variability due to inevitable individual anatomic variation and differences in imaging orientation (see SEM depicted in Figure S3F). Therefore, to account for any potential uncertainty in the border assignment, we calculated the intensity value for each compartment by averaging pixels within the area comprising only the middle 50% of each compartment within the calculated borders. These values were used to calculate significance of

intercompartmental differences within individuals (Figures 4C-D, and S4D-G), changes within compartments due to DAN activity (Figures 5A-C and S5A) and differences between control profiles and dopamine signaling mutants or RNAi (Figures 5D-E and S5C-E).

For imaging of DANs and MBONs (Figures 2, 3, 6B-E, 7, S2, S6C and S7), ROIs were manually drawn based on the clear anatomic segregation of their innervation patterns in different compartments. For KC time-series traces (Figures 4C-D) ROIs were defined by compartmental border determination as described above. For single synapse time-series traces (Figure 4F), circular ROIs were manually drawn around individual synapses along the length of the lobe, identified by puncta labeled with sytGCaMP. In sparsely labeled KC axons co-expressing sytGCaMP and tdTomato, the tdTomato signal was first used to generate a mask in order to eliminate background signal due to low basal fluorescence outside of the labeled axons. The sytGCaMP odor responses were then divided by the tdTomato signal on a pixel-by-pixel basis. For  $\Delta F/F_0$  calculations in DANs and MBONs the difference between the pre-stimulus value (average of 4-5 frames ending >1 frame before stimulus) and post-stimulus value (average of the 2-3 frames spanning the peak of the stimulus evoked response) was divided by the pre-stimulus value.

Note that in the case of DAN population imaging (Figures 2, 3 and S2), the DANs exhibit strong fluctuations in their basal activity, making it inaccurate to define a single absolute baseline  $F_0$ . The  $F_0$  values used in the heatmap images are therefore simply the immediate pre-stimulus average, as described above, and should not be interpreted as a true minimum baseline. Indeed, because all DAN populations appeared to fluctuate between high and low activity states, the representative traces and stimulus-triggered averages for DAN population activity were all normalized between 0 and 1, where 0 represents the minimum fluorescence of the DAN compartment during a trace and 1 represents the maximum. Raw fluorescence traces of DAN activity depicting the relative levels of activation due to different stimuli are presented in Figure S2A. The normalized DAN activity data was used to measure the integrated basal activity in Figure S2D. As a consequence, we potentially underestimate the differences between basal signals in each DAN population, as the raw intensities in  $\gamma 2$ -  $\gamma 3$  were generally higher than those in  $\gamma 4$ -  $\gamma 5$  (data not shown).

#### ***Stimulus-Triggered Averages*** (Figures 2 and 3)

The normalized time series of sytGCaMP fluorescence in each compartment were aligned to the time point when the stimulus was applied for each replicate. In the case of Figure 2E, the ‘stimulus’ refers to the time point at which bouts of leg flailing started and stopped, as identified in the fly motion traces and confirmed by manual video analysis. Traces beginning 5 seconds before the stimulus and ending 5 seconds after the stimulus were averaged and displayed.

#### ***Cross-correlation Analysis*** (Figures 2D and S2B-S2C):

Motion-tracking data was aligned to functional imaging data as described above. Pearson product-moment correlation coefficients between pairs of DANs and between individual DANs and motion were calculated for a 60-120 second recording in each animal. The resulting correlation coefficients were averaged and used to generate the cross-correlogram shown in the figures. Data in Figure S2B was calculated from individual traces in the same animal.

#### **Statistical Analysis**

Statistical analysis was performed using custom scripts in Excel and R. The significance of all results was tested by ANOVA followed by 2-tailed T-tests with Holm-Bonferroni post-hoc correction for multiple comparisons. Paired T-tests were used for changes in DAN activity due to all stimuli (Figures 2-3, Table S1), compartmental differences (Figures 4C-D, S4D-G), KC changes due to DAN activation or sugar feeding (Figures 5A-5C), MBON activity differences and changes (Figures 6, 7, S6C, S7), DAN basal activity differences (Figure S2D), and comparison of KC spiking due to current injection (Figure S6B). Unpaired T-tests were used for DopR/dDAT mutant/RNAi data (Figures 5D-E, and S5C-S5E) and comparisons of EPSC amplitudes due to optogenetic DAN activation (Figure S6A). To measure the significance of changes in DAN activity within each compartment due to exogenous stimuli or changes in behavioral state (Figures 2-3), DAN activity values were calculated by averaging the fluorescence intensity for 5 frames prior to the stimulus and for the 5 frames spanning the peak of the stimulus evoked response. The same windows were used for all compartments and all individuals within each panel. Changes within



each compartment were then measured by paired-T-test (Table S1). In some experiments (as indicated), each mushroom body of an animal was treated as an independent sample.

#### **Optogenetic Activation of DANs (Figure S6A)**

Flies expressing ReaChR, a red-shifted channelrhodopsin variant, in DANs using 58E02-LexA, LexAOP-ReaChR transgenes, were placed on food containing 400  $\mu$ M all-trans retinal, a ReaChR cofactor, for 18-36 hours prior to dissection. Targeting of the  $\gamma$ 4 MBON soma was carried out under fluorescence guidance, using the minimum possible intensity and duration of illumination by a 490 nm LED. Nevertheless, upon initiation of whole-cell recording, we observed that  $\gamma$ 4 MBONs exhibited significantly larger excitatory postsynaptic potentials (EPSPs) and excitatory postsynaptic currents (EPSCs) when the 58E02-LexA, LexAOP-ReaChR transgenes were present in comparison to control animals lacking ReaChR expression. This observation suggests that ReaChR stimulation during dissection of the brain from its capsule under white light LED illumination and targeting of the  $\gamma$ 4 MBON soma under fluorescence illumination is sufficient to activate DANs and alter properties of synaptic transmission.

#### **Larval NMJ Immunostaining (Figure S1G)**

Wandering third instar larvae were fileted in PBS. Dissected larvae were fixed for 2 min in Bouin's solution (Sigma) then rinsed with PBS 4 times and blocked in 5% Normal Goat Serum in PBS + 0.1% TritonX-100 for 2 hours at RT. Primary antibody 1:250 mouse anti-DCSP-2 (6D6) (Developmental Studies Hybridoma Bank), 1:50 mouse anti-Bruchpilot (NC82) (Developmental Studies Hybridoma Bank) and 1:10,000 rabbit anti-GFP (Life Technologies A-11122) was incubated overnight 4°C. Larvae were washed extensively in PBS + 0.1% TritonX-100 then incubated for 2 hours at RT with 1:400 goat anti-mouse Alexa Fluor 633 (Life Technologies A-21052), 1:400 goat anti-rabbit Alexa Fluor 488 (Life Technologies A-11034) and 1:500 Rhodamine Red-X conjugated goat anti-Horseradish Peroxidase (Jackson ImmunoResearch Laboratories 123-295-021). Larvae were then washed extensively in PBS + 0.1% TritonX-100 and mounted in Vectashield (Vector Laboratories). Images were captured on a Zeiss LSM 880 using a Plan-Apochromat 40X (1.4 NA) Oil DIC objective.

#### **Adult Brain Immunostaining (Figure S4B)**

Day 1 adult brains were dissected in 1X PBS pH 7.4 then immediately transferred to cold 1% PFA (Electron Microscopy Sciences) and fixed overnight at 4°C. Following overnight incubation samples were washed in PAT3 Buffer (0.5% BSA/0.5% Triton/1X PBS pH 7.4) 3 times. Brains were blocked in 3% Normal Goat Serum for 90 minutes at RT. Primary antibody 1:1000 rabbit anti-GFP (Life Technologies A-11122) was incubated 3 hours at RT then overnight at 4°C. Brains were washed extensively in PAT3 Buffer. Secondary antibody 1:400 goat anti-rabbit Alexa Fluor 488 (Life Technologies A-11034) was incubated 3 hours at RT then 5 days at 4°C. Brains were washed 3 times in PAT3 Buffer then once in 1X PBS. Samples were mounted in Vectashield (Vector Laboratories). Images were captured on a Zeiss LSM 880 using a Plan-Apochromat 20X DIC objective.

#### **RNA Isolation and qRT-PCR (Figure S5B)**

Total RNA was isolated from dissected brains of day 1 adult females. RNA was extracted using Qiazol reagent (QIAGEN) then column purified by RNeasy micro kit (QIAGEN). cDNA was generated using Quantitect Reverse Transcriptase kit (QIAGEN). Taqman real-time qPCR experiments were performed on a QuantStudio 12K Flex Real-Time PCR System (ThermoFisher Scientific) following the manufacturer's instructions. Data were analyzed using the comparative  $2\Delta\Delta C_t$  method using alphaTub84B as an endogenous control. The average fold-change relative to the pan-neuronal nsyb-GAL4 driver line alone was calculated. The following Taqman assays from ThermoFisher Scientific were used: *alphaTub84B* (Dm02361072\_s1), *DopR1* (Dm02134814\_m1), *DopR2* (Dm02151745\_m1), and *D2R* (Dm01845575\_m1).

#### **Electrophysiology (Figures 6A and S6A-S6B)**

$\gamma$ 4 MBON and KC soma were targeted for patch recording by fluorescence from expression of soluble GCaMP or CD8-GFP. Dissected brain explants were treated with 2 mg mL<sup>-1</sup> collagenase (Sigma) in external saline for ~30 sec to soften the perineural sheath and pinned to a Sylgard sheet. The exposed neuropil was then continuously perfused (about 2–3 mL min<sup>-1</sup>) with perfusion saline (108 mM NaCl, 5 mM KCl, 2 mM CaCl<sub>2</sub>, 8.2 mM MgCl<sub>2</sub>, 26 mM NaHCO<sub>3</sub>, 1 mM NaH<sub>2</sub>PO<sub>4</sub>, 5 mM trehalose, 5 mM sucrose, 5 mM HEPES, osmolarity adjusted to 275 mOsm). The perfusion saline was continuously bubbled with

95% O<sub>2</sub>/5% CO<sub>2</sub> and reached a final pH of 7.3. To gain access to the soma, the sheath was broken by positive pressure from ejection of saline through a large bore broken electrode.

Intracellular recordings were performed with fire-polished patch electrodes (10–15 MΩ for MBONs, 15–20 MΩ for KCs) filled with internal saline (130 mM potassium aspartate, 8 mM KCl, 0.2 mM MgCl<sub>2</sub>, 5 mM sucrose, 10 mM HEPES pH 7.3, 10 mM EGTA). Current traces were acquired in voltage-clamp mode (for MBONs and KCs) and current-clamp mode (for KCs) using a Multiclamp 700B amplifier, digitized at 10 kHz and filtered at 1 kHz. The membrane potential of voltage clamp recordings was nominally -70 mV, a voltage at which unclamped action potentials rarely break through and could be readily detected by their large amplitude. Evoked EPSCs were stimulated by acetylcholine iontophoresis into the calyx as described above. For each experiment, the responses to a train of 10 identical stimulation voltages, spaced 3 s apart were recorded before and after DAN activation. The data plotted in Figure 6A are the peak amplitude from stimulus-triggered averages for each experiment before and after DAN activation. In rare cases where stimulation evoked MBON spikes despite the voltage clamp, those responses were excluded from the average. We note that EPSC durations are likely exaggerated by low-pass filtering due to the high access resistance (50–100 MΩ) common to whole-cell recordings from *Drosophila* neurons (Murthy and Turner, 2013b).

In Figure S6A, spontaneous EPSCs from 30–60 s traces (1 per fly) were analyzed in Clampfit (Molecular Devices), using a template search algorithm, with the template defined by the prominent EPSCs in the modulated MBON prep. As EPSCs in the unmodulated state were sometimes too small for reliable detection, this template search algorithm likely results in an underestimate in the difference in EPSC amplitude due to DAN stimulation.

To confirm that the spontaneous EPSCs measured in the MBON originated from KC activity (Figure S6A), we filled a fine electrode with 0.2 M GABA in external saline. After recording baseline EPSCs, the GABA electrode was moved from a position within the perfused saline to within the center of the mushroom body calyx. No further positive pressure was required to eject GABA. GABA applied in this manner rapidly inhibited measured EPSCs and EPSPs but did not suppress occasional spontaneous spiking in the MBON in current clamp recordings (data not shown.)

|                     | $\gamma$ 2 DANs | $\gamma$ 3 DANs | $\gamma$ 4 DANs | $\gamma$ 5 DANs |
|---------------------|-----------------|-----------------|-----------------|-----------------|
| Sugar               | 0.020684751     | 0.038021709     | 0.035413261     | 4.16266E-05     |
| Shock               | 8.5723E-05      | 2.20578E-07     | 0.008606605     | 0.000795113     |
| Flail               | 1.21501E-11     | 2.568E-10       | 0.044450088     | 5.11192E-06     |
| Still               | 8.37411E-12     | 5.51872E-12     | 0.036962279     | 6.16218E-07     |
| 58E02-DANs> P2X2    | 1.07325E-09     | 0.61686413      | 3.94375E-07     | 1.56546E-08     |
| $\gamma$ 2 DAN>P2X2 | 0.009663704     | 6.87552E-09     | 2.06957E-06     | 6.71104E-06     |
| $\gamma$ 3 DAN>P2X2 | 0.000321854     | 0.000103841     | 1.19609E-05     | 3.48101E-07     |
| $\gamma$ 4 DAN>P2X2 | 0.000161199     | 0.001572201     | 6.61172E-06     | 1.29759E-05     |
| $\gamma$ 5 DAN>P2X2 | 0.013657448     | 6.42053E-05     | 3.52496E-05     | 0.000246935     |

**Table S1.**

Related to Figures 2 and 3.

p-values from paired T-tests comparing fluorescence intensities in DANs of each compartment before and after each stimulus shown in Figures 2 and 3.

## Supplemental References

Chen, T.W., Wardill, T.J., Sun, Y., Pulver, S.R., Renninger, S.L., Baohan, A., Schreiter, E.R., Kerr, R.A., Orger, M.B., Jayaraman, V., et al. (2013). Ultrasensitive fluorescent proteins for imaging neuronal activity. *Nature* *499*, 295–300.

Chen, Y., Akin, O., Nern, A., Tsui, C.Y.K., Pecot, M.Y., and Zipursky, S.L. (2014). Cell-type-specific labeling of synapses in vivo through synaptic tagging with recombination. *Neuron* *81*, 280–293.

Connolly, J.B., Roberts, I.J., Armstrong, J.D., Kaiser, K., Forte, M., Tully, T., and O’Kane, C.J. (1996). Associative learning disrupted by impaired Gs signaling in *Drosophila* mushroom bodies. *Science* *274*, 2104–2107.

Friggi-Grelín, F., Coulom, H., Meller, M., Gomez, D., Hirsh, J., and Birman, S. (2003). Targeted gene expression in *Drosophila* dopaminergic cells using regulatory sequences from tyrosine hydroxylase. *J. Neurobiol.* *54*, 618–627.

Gibson, D.G. (2009). Synthesis of DNA fragments in yeast by one-step assembly of overlapping oligonucleotides. *Nucleic Acids Res.* *37*, 6984–6990.

Gordon, M.D., and Scott, K. (2009). Motor control in a *Drosophila* taste circuit. *Neuron* *61*, 373–384.

Inagaki, H.K., Jung, Y., Hoopfer, E.D., Wong, A.M., Mishra, N., Lin, J.Y., Tsien, R.Y., and Anderson, D.J. (2014). Optogenetic control of *Drosophila* using a red-shifted channelrhodopsin reveals experience-dependent influences on courtship. *Nat. Methods* *11*, 325–332.

Ishikawa, D., Takahashi, N., Sasaki, T., Usami, A., Matsuki, N., and Ikegaya, Y. (2010). Fluorescent pipettes for optically targeted patch-clamp recordings. *Neural Networks* *23*, 669–672.

Ito, K., Suzuki, K., Estes, P., Ramaswami, M., Yamamoto, D., and Strausfeld, N.J. (1998). The organization of extrinsic neurons and their implications in the functional roles of the mushroom bodies in *Drosophila melanogaster* Meigen. *Learn. Mem.* *5*, 52–77.

Jenett, A., Rubin, G.M., Ngo, T.T.B., Shepherd, D., Murphy, C., Dionne, H., Pfeiffer, B.D., Cavallaro, A., Hall, D., Jeter, J., et al. (2012). A GAL4-driver line resource for *Drosophila* neurobiology. *Cell Rep.* *2*, 991–1001.

Keleman, K., Vrontou, E., Krüttner, S., Yu, J.Y., Kurtovic-Kozaric, A., and Dickson, B.J. (2012). Dopamine neurons modulate pheromone responses in *Drosophila* courtship learning. *Nature* *489*, 145–149.

Kohatsu, S., Koganezawa, M., and Yamamoto, D. (2011). Female contact activates male-specific interneurons that trigger stereotypic courtship behavior in *Drosophila*. *Neuron* *69*, 498–508.

Li, H., Chaney, S., Forte, M., and Hirsh, J. (2000). Ectopic g-protein expression in dopamine and serotonin neurons blocks cocaine sensitization in *Drosophila melanogaster*. *Curr. Biol.* *10*, 211–214.

Murthy, M., and Turner, G. (2013a). Dissection of the head cuticle and sheath of living flies for whole-cell patch-clamp recordings in the brain. *Cold Spring Harb. Protoc.* *8*, 134–139.

Murthy, M., and Turner, G. (2013b). Whole-cell in vivo patch-clamp recordings in the *Drosophila* brain. *Cold Spring Harb. Protoc.* *8*, 140–148.

Pitman, J.L., Huetteroth, W., Burke, C.J., Krashes, M.J., Lai, S.L., Lee, T., and Waddell, S. (2011). A pair of inhibitory neurons are required to sustain labile memory in the drosophila mushroom body. *Curr. Biol.* *21*, 855–861.

Riemensperger, T., Völler, T., Stock, P., Buchner, E., and Fiala, A. (2005). Punishment prediction by dopaminergic neurons in *Drosophila*. *Curr. Biol.* *15*, 1953–1960.

Tempel, B.L., Bonini, N., Dawson, D.R., and Quinn, W.G. (1983). Reward learning in normal and mutant *Drosophila*. *Proc. Natl. Acad. Sci. U. S. A.* *80*, 1482–1486.

Tully, T., and Quinn, W.G. (1985). Classical conditioning and retention in normal and mutant *Drosophila melanogaster*. *J. Comp. Physiol. A.* *157*, 263–277.

Wu, J.S., and Luo, L. (2006). A protocol for mosaic analysis with a repressible cell marker (MARCM) in *Drosophila*. *Nat. Protoc.* *1*, 2583–2589.

Yao, Z., Macara, A.M., Lelito, K.R., Minosyan, T.Y., and Shafer, O.T. (2012). Analysis of functional neuronal connectivity in the *Drosophila* brain. *J. Neurophysiol.* *108*, 684–696.
